# Supplementary material for: TLR4 Agonist Combined with Trivalent Protein JointS of Streptococcus suis Provides Immunological Protection in Animals
Source: MDPI journal article supplement (doi:10.3390/vaccines9020184), 2021-02-22
Supplement: s1 [file s1]

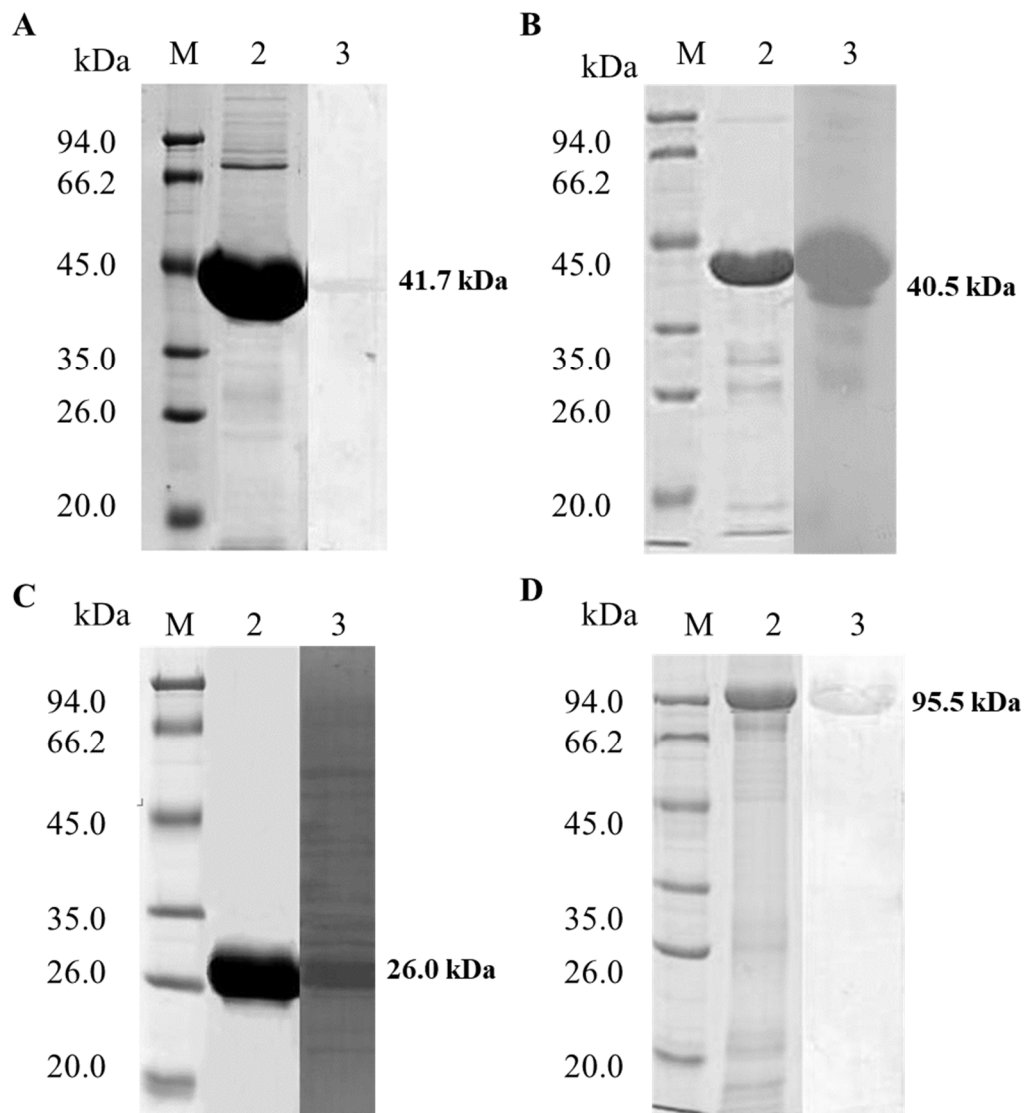

**Figure S1** SDS-PAGE and western blot analyses of GAPDH (A), MRP (B), DLD (C), and recombinant JointS (D) proteins

M, Marker; Lane 2, the SDS-PAGE analysis of purified proteins; Lane 3, the western blot analysis of purified proteins with convalescent sera against *Streptococcus suis* serotype 2 HA9801.

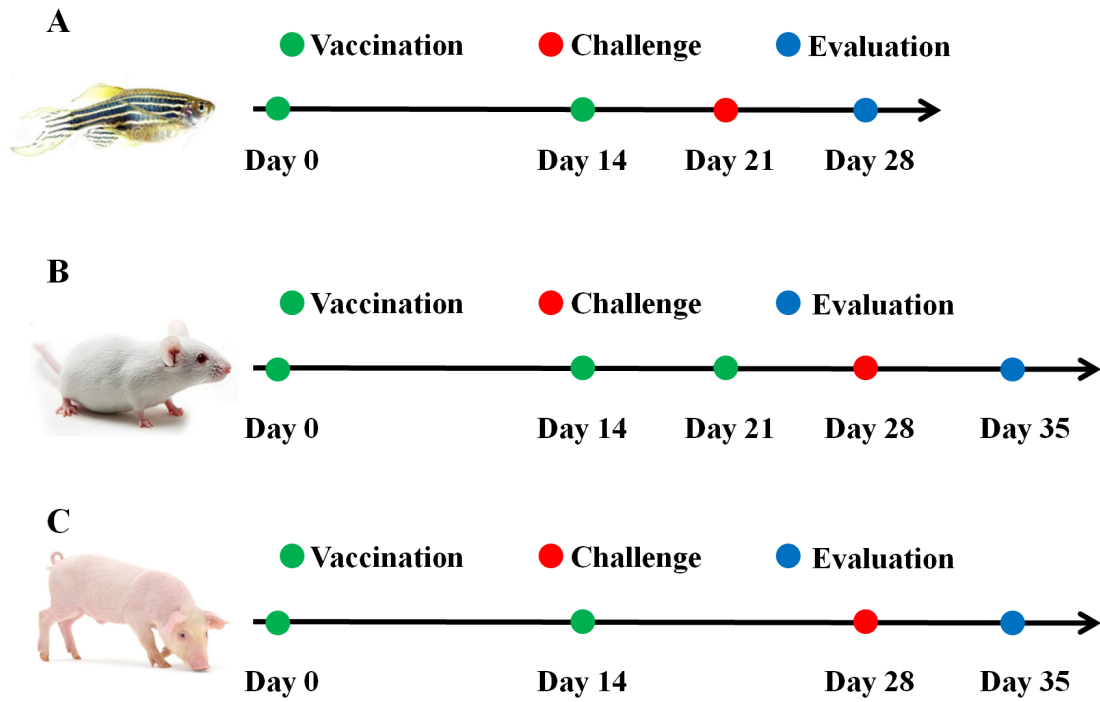

**Figure S2** Scheme of the vaccination protocols for (A) zebrafish, (B) mice, and (c) piglets
